# Supplementary material
Source: PubMed Central journal article supplement (PMC5654394)
Supplement: PEDS_20171640SupplementaryData.pdf [file PEDS_20171640SupplementaryData.pdf]

## Supplemental Information

### CALCULATION OF ABSM

The ABSM is a validated and established composite of geocoded information that we used to characterize enrollees' socioeconomic backgrounds.

The ABSM is comprised of the 10 census-based SE variables (Supplemental Table 4) shown to be reflective of neighborhood health risks, and it has been shown to be representative of numerous area-based health risks (eg, lead exposure<sup>16,17,56</sup> and communicable diseases<sup>18–22</sup>) and may be more predictive of health outcomes such as mortality than individual-level predictors are.<sup>13,23,57</sup>

This process entails mapping enrollees' addresses to their respective census tracts and then linking census tracts to the 10 census tract variables that comprise the validated ABSM.<sup>34</sup> To determine ABSM, we geocoded enrollees to corresponding census tracts and linked tracts to Krieger's 10 census-defined variables. Then, we calculated a z score for each of these 10 variables, standardizing values against those for Massachusetts as a whole (ie, if a census tract's value for a variable was equivalent to the state's average, then the census tract's z score for that variable was 0). We weighted each census variable equally per previously described methodologies.<sup>34,58–61</sup> For the analysis on component spending, we calculated a z score for each component variable so that each

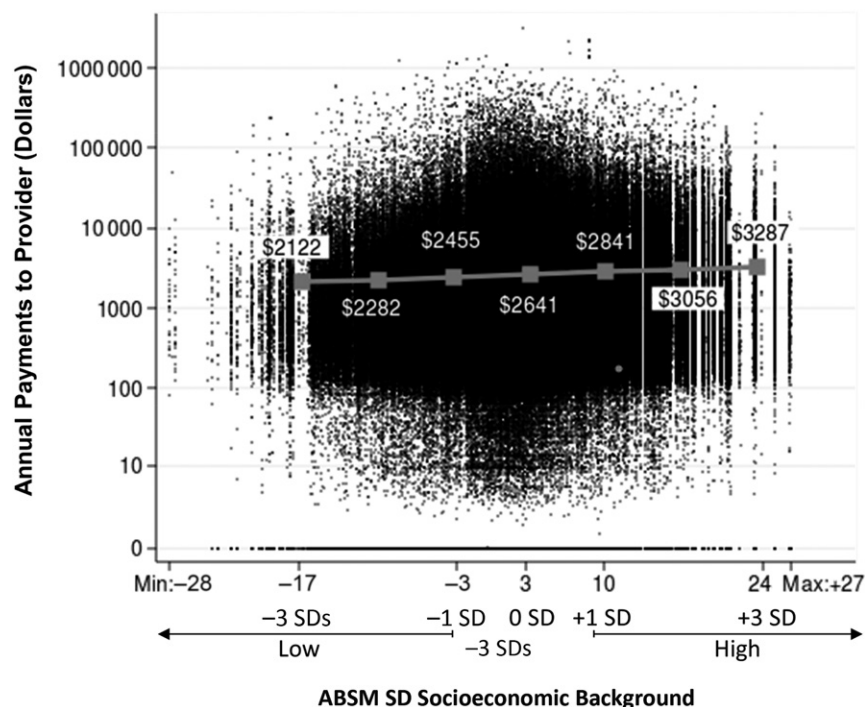

**SUPPLEMENTAL FIGURE 2**

Geocoded socioeconomic background and annual payments to provider: observed and adjusted. ● = observed; ■ = adjusted.

variable is standardized against each enrollees' state of residence (ie, if an enrollee resides in Massachusetts and his or her census tract's value for a variable equals the Massachusetts mean, then the corresponding z score will be 0). We standardized enrollee tract information against state means because health-related programs (eg, Medicaid eligibility) varies at the state level.<sup>62,63</sup>

**SUPPLEMENTAL TABLE 4** Socioeconomic

| Variables Available From the American Community Survey |
|--------------------------------------------------------|
| Median household income                                |
| Percent of persons within a tract                      |
| <12 y of education                                     |
| ≥4 y of college education                              |
| Unemployed                                             |
| Employed in working-class occupations                  |
| Living below the federal poverty line                  |
| Percent of households within a tract                   |
| Income <50% of median income                           |
| Income >400% of median income                          |
| >1 person per room                                     |
| Percent of homes within a tract                        |
| Worth >400% of median home value                       |

These variables can be used to create the composite ABSM.

**SUPPLEMENTAL TABLE 5** Enrollee Characteristics: BCBSMA 2008–2012

|                                                  | N         | %      |      |        |     |           |
|--------------------------------------------------|-----------|--------|------|--------|-----|-----------|
| Person years                                     | 1 182 847 | 100    |      |        |     |           |
| Unique enrollees                                 | 459 180   | 39     |      |        |     |           |
| Age, y                                           |           |        |      |        |     |           |
| 0–1                                              | 110 973   | 9      |      |        |     |           |
| 2–6                                              | 261 104   | 22     |      |        |     |           |
| 7–12                                             | 355 119   | 30     |      |        |     |           |
| 13–17                                            | 323 591   | 27     |      |        |     |           |
| 18–19                                            | 132 060   | 11     |      |        |     |           |
| Male                                             | 604 204   | 51     |      |        |     |           |
| No. of chronic conditions <sup>a</sup>           |           |        |      |        |     |           |
| 0                                                | 636 687   | 54     |      |        |     |           |
| 1                                                | 340 363   | 29     |      |        |     |           |
| 2                                                | 135 700   | 11     |      |        |     |           |
| ≥3                                               | 70 097    | 6      |      |        |     |           |
| Health plan type <sup>b</sup>                    |           |        |      |        |     |           |
| Employer insured                                 | 807 966   | 68     |      |        |     |           |
| Self-insured                                     | 374 881   | 32     |      |        |     |           |
| Basic benefit design <sup>c</sup>                |           |        |      |        |     |           |
| Health maintenance organization                  | 868 809   | 73     |      |        |     |           |
| Preferred provider organization                  | 253 040   | 21     |      |        |     |           |
| Point of service                                 | 60 998    | 5      |      |        |     |           |
| Geocoded socioeconomic background <sup>d,e</sup> |           |        |      |        |     |           |
| High                                             | 181 350   | 15     |      |        |     |           |
| Medium                                           | 850 804   | 72     |      |        |     |           |
| Low                                              | 150 693   | 13     |      |        |     |           |
| Proportion with any spending in category         | 1 146 277 | 97     |      |        |     |           |
| Outpatient                                       | 1 138 499 | 96     |      |        |     |           |
| Prescription medications                         | 800 434   | 68     |      |        |     |           |
| ED                                               | 176 895   | 15     |      |        |     |           |
| Inpatient                                        | 72 326    | 6      |      |        |     |           |
| Per person annual spending, \$                   | N         | Median | Mean | SD     | Min | Max       |
| Annual payments to provider                      | 1 182 847 | 969    | 2864 | 13 944 | 0   | 3 225 990 |
| Outpatient                                       | 1 182 847 | 763    | 1807 | 7066   | 0   | 2 192 564 |
| Prescription medications                         | 1 182 847 | 27     | 328  | 1820   | 0   | 468 908   |
| ED                                               | 1 182 847 | 0      | 41   | 157    | 0   | 14 836    |
| Inpatient                                        | 1 182 847 | 0      | 689  | 10 515 | 0   | 3 211 813 |

<sup>a</sup> Agency for Healthcare Research and Quality. Chronic Condition Indicator (CCI) for ICD-9-CM. Available at: <http://www.hcup-us.ahrq.gov/toolssoftware/chronic/chronic.jsp>. Accessed September 23, 2014.<sup>50</sup>

<sup>b</sup> Employer sponsored means an employer purchases health insurance from a health plan on behalf of employees, and the insurer takes the financial risk. Self-insured means that the employer designs and funds his or her own health plan for employees; the employer takes the financial risk and may pay health plan fees to administer the health plan (eg, process claims).

<sup>c</sup> Health maintenance organization and point of service benefit designs typically require enrollees to designate a primary care provider who directs care within a designated network for which there are no or limited patient out-of-pocket costs; out-of-pocket costs rise if patients seek out-of-network care. In health maintenance organizations, patients must involve their primary care providers in directing care to a greater extent than in point of service plans. In preferred provider organization plans, primary care providers are not required to direct care, and enrollees typically pay some out-of-pocket amounts for the care they seek.

<sup>d</sup> Krieger N, Chen JT, Waterman PD, Rehkopf DH, Subramanian SV. Painting a truer picture of US socioeconomic and racial/ethnic health inequalities: the Public Health Disparities Geocoding Project. *Am J Public Health*. 2005;95(2):312–323.<sup>32</sup>

<sup>e</sup> High geocoded socioeconomic background means living in a census tract with an ABSM score >1 SD above the state mean. Low geocoded socioeconomic background is equivalent to living in a census tract with an ABSM score <−1 SD below the state mean. Medium corresponds to living in a census tract with an ABSM score between 1 and −1 SD of the mean.

**SUPPLEMENTAL TABLE 6** Geocoded Socioeconomic Background and Annual Payments to Provider:  
Typical Risk-Adjustment Model for Health Plan Spending

|                                                                | Percent<br>Change | 95% CI, % |       | P     |
|----------------------------------------------------------------|-------------------|-----------|-------|-------|
| Geocoded socioeconomic background <sup>a,b</sup>               | +1.10             | +1.03     | +1.16 | <.001 |
| Age, y (0–1 as referent)                                       |                   |           |       |       |
| 2–6                                                            | –66               | –66       | –65   | <.001 |
| 7–12                                                           | –72               | –73       | –72   | <.001 |
| 13–17                                                          | –65               | –66       | –64   | <.001 |
| 18–19                                                          | –62               | –63       | –61   | <.001 |
| Sex (male as referent)                                         |                   |           |       |       |
| Female                                                         | –5                | –6        | –4    | <.001 |
| No. of chronic conditions <sup>c</sup> (0 as referent)         |                   |           |       |       |
| 1                                                              | +153              | +151      | +156  | <.001 |
| 2                                                              | +354              | +348      | +360  | <.001 |
| 3                                                              | +649              | +634      | +665  | <.001 |
| 4                                                              | +1145             | +1101     | +1192 | <.001 |
| ≥5                                                             | +3007             | +2769     | +3265 | <.001 |
| Health plan type <sup>d</sup> , (employer insured as referent) |                   |           |       |       |
| Self-insured                                                   | +6                | +5        | +7    | <.001 |
| Basic benefit design <sup>e</sup> (HMO as referent)            |                   |           |       |       |
| Preferred provider organization                                | +0                | –1        | +1    | .67   |
| Point of service                                               | +6                | +4        | +8    | <.001 |

HMO, health maintenance organization.

<sup>a</sup> Agency for Healthcare Research and Quality. Chronic Condition Indicator (CCI) for ICD-9-CM. Available at: <http://www.hcup-us.ahrq.gov/toolssoftware/chronic/chronic.jsp>. Accessed September 23, 2014.<sup>50</sup>

<sup>b</sup> ABSM is a continuous value between –28 and +27.

<sup>c</sup> Krieger N, Chen JT, Waterman PD, Rehkopf DH, Subramanian SV. Painting a truer picture of US socioeconomic and racial/ethnic health inequalities: the Public Health Disparities Geocoding Project. *Am J Public Health*. 2005;95(2):312–323.<sup>32</sup>

<sup>d</sup> Employer sponsored means that an employer purchases health insurance from a health plan on behalf of employees, and the insurer takes the financial risk. Self-insured means that the employer designs and funds his or her own health plan for employees; the employer takes the financial risk and may pay health plan fees to administer the health plan (eg, process claims).

<sup>e</sup> Health maintenance organization and point of service benefit designs typically require enrollees to designate a primary care provider who directs care within a designated network for which there are no or limited patient out-of-pocket costs; out-of-pocket costs rise if patients seek out-of-network care. In health maintenance organizations, patients must involve their primary care providers in directing care to a greater extent than in point of service plans. In preferred provider organizations plans, primary care providers are not required to direct care, and enrollees typically pay some out-of-pocket amounts for the care they seek.

**SUPPLEMENTAL TABLE 7** High and Low Geocoded Socioeconomic Backgrounds: Use and Prices for Outpatient, Inpatient, Pharmacy, and ED Services

| Type of Service,<br>Annual | Prices, \$                                                         |        |                 |               |                                                                    |        |                 |               |                                                                    |        |                 |               |      |       |      |       |      |       |       |
|----------------------------|--------------------------------------------------------------------|--------|-----------------|---------------|--------------------------------------------------------------------|--------|-----------------|---------------|--------------------------------------------------------------------|--------|-----------------|---------------|------|-------|------|-------|------|-------|-------|
|                            | Use                                                                |        |                 |               | High Socioeconomic Background                                      |        |                 |               | Low Socioeconomic Background                                       |        |                 |               |      |       |      |       |      |       |       |
|                            | High Socioeconomic Background<br>(ABSM > 1 SD Above Enrollee Mean) | 95% CI | Median Observed | Mean Adjusted | High Socioeconomic Background<br>(ABSM > 1 SD Above Enrollee Mean) | 95% CI | Median Observed | Mean Adjusted | High Socioeconomic Background<br>(ABSM < 1 SD Below Enrollee Mean) | 95% CI | Median Observed | Mean Adjusted |      |       |      |       |      |       |       |
| Outpatient encounters      | 7.9                                                                | 7.9    | 5.0             | 7.9           | 8.0                                                                | 4.0    | 6.4             | 6.4           | 6.5                                                                | <.001  | 125             | 250           | 248  | 252   | 122  | 235   | 233  | 237   | <.001 |
| Prescription drug classes  | 1.7                                                                | 1.7    | 1.0             | 1.5           | 1.5                                                                | 1.0    | 1.5             | 1.6           | 1.6                                                                | <.001  | 32              | 174           | 167  | 182   | 25   | 132   | 127  | 136   | <.001 |
| Inpatient Admissions       | 0.07                                                               | 0.067  | 0.0             | 0.08          | 0.076                                                              | 0.0    | 0.08            | 0.079         | 0.079                                                              | <.001  | 2711            | 9792          | 9295 | 10289 | 2657 | 10336 | 9706 | 10967 | .10   |
| Length of stay, d          | 4.3                                                                | 4.2    | 2.0             | 4.3           | 4.2                                                                | 2.0    | 4.2             | 4.5           | 4.5                                                                | .77    | —               | —             | —    | —     | —    | —     | —    | —     | —     |
| ED visits                  | 0.18                                                               | 0.18   | 0.0             | 0.23          | 0.22                                                               | 0.0    | 0.23            | 0.23          | 0.23                                                               | <.001  | 159             | 221           | 218  | 223   | 146  | 190   | 288  | 192   | <.001 |

—, not applicable.

**SUPPLEMENTAL REFERENCES**

56. Kim D, Galeano MAO, Hull A, Miranda ML. A framework for widespread replication of a highly spatially resolved childhood lead exposure risk model. *Environ Health Perspect.* 2008;116(12):1735–1739
57. Subramanian SV, Chen JT, Rehkopf DH, Waterman PD, Krieger N. Comparing individual- and area-based socioeconomic measures for the surveillance of health disparities: a multilevel analysis of Massachusetts births, 1989-1991. *Am J Epidemiol.* 2006;164(9):823–834
58. Krieger N, Chen JT, Waterman PD, Rehkopf DH, Subramanian SV. Race/ethnicity, gender, and monitoring socioeconomic gradients in health: a comparison of area-based socioeconomic measures—the public health disparities geocoding project. *Am J Public Health.* 2003;93(10):1655–1671
59. Erickson SE, Iribarren C, Tolstykh IV, Blanc PD, Eisner MD. Effect of race on asthma management and outcomes in a large, integrated managed care organization. *Arch Intern Med.* 2007;167(17):1846–1852
60. Coberley CR, Puckrein GA, Dobbs AC, McGinnis MA, Coberley SS, Shurney DW. Effectiveness of disease management programs on improving diabetes care for individuals in health-disparate areas. *Dis Manag.* 2007;10(3):147–155
61. Pollack LA, Gotway CA, Bates JH, et al. Use of the spatial scan statistic to identify geographic variations in late stage colorectal cancer in California (United States). *Cancer Causes Control.* 2006;17(4):449–457
62. US Department of Health and Human Services. 2015. Poverty guidelines. Available at: <https://aspe.hhs.gov/2015-poverty-guidelines>. Accessed January 28, 2016
63. National Association of State Budget Officers. State Expenditure Report: Examining Fiscal 2011-2013 State Spending. Washington, DC: National Association of State Budget Officers; 2013
